# Supplementary material
Source: ML conference proceedings conference paper supplement (https://openaccess.thecvf.com/content/CVPR2026/html/Kucukpinar_Linear_Fundamental_Matrix_CVPR_2026_paper.html)
Supplement: Supplementary file 1 [file Kucukpinar_Linear_Fundamental_Matrix_CVPR_2026_supplemental.pdf]

# Linear Fundamental Matrix Estimation from 7 or 5 Points

## Supplementary Material

### 8. Additional Details on Real Data Results

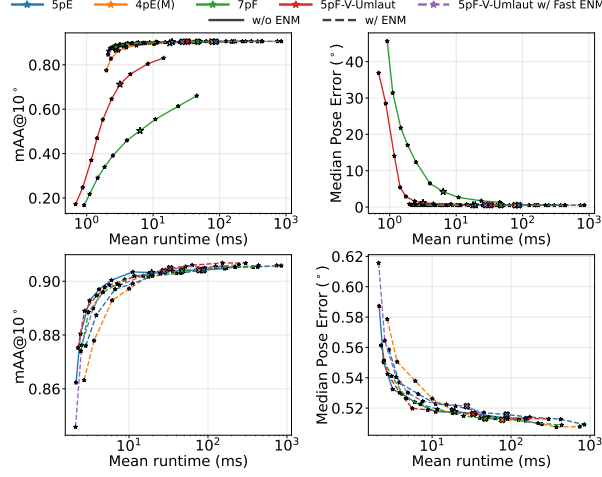

Figure 6. Runtime versus pose accuracy results for the Sacré-Cœur scene in the PhotoTourism [27] validation set. Top row shows all methods, bottom row zooms in on top performers. All methods use the PoseLib LO-RANSAC [30] implementation, with the number of RANSAC iterations in the set  $\{10, 20, 50, 100, 200, 500, \mathbf{1000}, 2000, 5000, 10000\}$  and a 1-pixel epipolar threshold. Combined relative pose error is calculated as  $\max(\theta_R, \theta_t)$ . Results at 1000 RANSAC iterations are highlighted with larger markers, with stars for methods without ENM and X markers for methods with ENM.

We show the Sacré-Cœur scene results from the PhotoTourism validation set in Figure 6, where most methods perform best. Table 2 additionally reports results for each PhotoTourism scene separately. These results show that V-Umlaut can provide comparable performance to top methods without using ENM when a scene is generally easier for all methods. Although V-Umlaut shows a larger performance drop in more challenging scenes, its runtime advantage is preserved across all scenes, leaving room for improvement through increased RANSAC iterations or by using ENM.

### 9. Details of Derivation

In Figure 7, we provide code for the computer algebra system Macaulay2 [18] that can be used to derive the equations of the rational map  $\mathbf{F}_{\text{coords}} = \Phi(s, x, y)$  discussed in Section 3. The formulas for these rational expressions are rather long, but still compact enough to easily cut-and-paste them into our C++ implementation of Solver 3.1.

For the coefficients in equation (18), we find from the

```

FF = frac(QQ[x_1..x_3, y_1..y_3,
            s_(1,1)..s_(2,2)]);
R = FF[f_(2,1), f_(3,1), f_(1,2),
        f_(1,3), f_(2,3)];
F = matrix{
    {0,          f_(1,2), f_(1,3)},
    {f_(2,1),    0,     f_(2,3)},
    {f_(3,1),    1,     0      }
};
I = id_(R^3);
xs = apply(3, i -> I_{i});
xs = xs | {sum xs}
ys = xs;
comb = (pts, i, j, c) ->
    c*pts#i + (1-c) * pts#j;
xs = xs | {
    comb(xs, 0, 1, s_(1,1)),
    comb(xs, 0, 2, s_(1,2)),
    matrix{{x_1}, {x_2}, {x_3}}};
ys = ys | {
    comb(ys, 0, 1, s_(2,1)),
    comb(ys, 0, 2, s_(2,2)),
    matrix{{y_1}, {y_2}, {y_3}}};
Ilin = ideal apply(xs, ys, (x, y) ->
    transpose y * F * x);
netList Ilin_*
eq4 = (Ilin_*)#4;
eq5 = (Ilin_*)#5;
factor((det F)%(ideal(eq4, eq5)))
c1s = s_(1,1)*s_(2,2)*
    (1-s_(1,2))*(1-s_(2,1))
c2s = s_(1,2)*s_(2,1)*
    (1-s_(1,1))*(1-s_(2,2))
I = Ilin + ideal(c1s*f_(2,3)+c2s)
netList apply(gens R, g -> g => g%I)

```

Figure 7. Macaulay2 code.

output of the factor command in Figure 7 that

$$c_1(s) = s_{11}s_{22}(1 - s_{12})(1 - s_{21}), \quad (23)$$

$$c_2(s) = s_{12}s_{21}(1 - s_{11})(1 - s_{22}). \quad (24)$$

The operator % used in this code is the remainder after polynomial division modulo an ideal, which is computed using Gröbner bases [11]. The final line in this code prints the coordinate functions of the rational map  $\Phi(s, x, y)$ , giving each entry of  $\mathbf{F}_{\text{coords}}$  in terms of input data.

| Scene                          | Median Pose Error (°) |             |             |              | Mean Runtime (ms)           |               |               |              |              |                             |
|--------------------------------|-----------------------|-------------|-------------|--------------|-----------------------------|---------------|---------------|--------------|--------------|-----------------------------|
|                                | w/o ENM               |             |             |              |                             |               |               |              |              |                             |
|                                | 5pE                   | 4pE (M)     | 7pF         | 5pF-V-Umlaut | 5pE                         | 4pE (M)       | 7pF           | 5pF-V-Umlaut |              |                             |
| <i>Brandenburg Gate</i>        | 1.33                  | 1.36        | 6.86        | 5.36         | 19.97                       | 19.38         | 6.26          | 2.68         |              |                             |
| <i>Buckingham Palace</i>       | 1.43                  | 1.51        | 4.00        | 5.31         | 23.53                       | 22.70         | 7.45          | 3.03         |              |                             |
| <i>Colosseum Exterior</i>      | 1.13                  | 1.13        | 4.29        | 3.64         | 27.94                       | 26.20         | 8.74          | 3.92         |              |                             |
| <i>Grand-Place Brussels</i>    | 1.89                  | 1.96        | 7.81        | 18.80        | 29.90                       | 28.37         | 10.63         | 3.93         |              |                             |
| <i>Notre-Dame Front Facade</i> | 1.42                  | 1.42        | 8.89        | 3.00         | 27.48                       | 25.67         | 8.43          | 3.94         |              |                             |
| <i>Palace of Westminster</i>   | 1.12                  | 1.17        | 20.46       | 8.05         | 18.59                       | 17.77         | 5.90          | 2.68         |              |                             |
| <i>Pantheon Exterior</i>       | 1.43                  | 1.53        | 6.14        | 8.28         | 20.19                       | 19.63         | 6.94          | 2.82         |              |                             |
| <i>Reichstag</i>               | 1.31                  | 1.30        | 2.90        | 3.04         | 35.70                       | 34.79         | 11.11         | 4.51         |              |                             |
| <i>Sacré-Cœur</i>              | 0.52                  | 0.52        | 4.24        | 1.17         | 19.35                       | 17.85         | 6.37          | 3.17         |              |                             |
| <i>St. Peter's Square</i>      | 1.71                  | 1.85        | 7.28        | 7.19         | 24.71                       | 24.05         | 7.87          | 3.43         |              |                             |
| <i>Taj Mahal</i>               | 0.69                  | 0.72        | 5.84        | 2.97         | 22.49                       | 22.19         | 7.23          | 3.49         |              |                             |
| <i>Temple Nara Japan</i>       | 1.05                  | 1.09        | 3.40        | 2.10         | 30.17                       | 29.64         | 10.10         | 4.88         |              |                             |
| <i>Trevi Fountain</i>          | 1.57                  | 1.65        | 3.82        | 4.93         | 20.89                       | 19.40         | 7.87          | 3.25         |              |                             |
| <b>Overall</b>                 | <b>1.26</b>           | <b>1.31</b> | <b>5.53</b> | <b>4.26</b>  | <b>24.68</b>                | <b>23.66</b>  | <b>8.07</b>   | <b>3.52</b>  |              |                             |
| w/ ENM                         |                       |             |             |              |                             |               |               |              |              |                             |
| Scene                          | 5pE                   | 4pE (M)     | 7pF         | 5pF-V-Umlaut | 5pF-V-Umlaut<br>w/ Fast ENM | 5pE           | 4pE (M)       | 7pF          | 5pF-V-Umlaut | 5pF-V-Umlaut<br>w/ Fast ENM |
| <i>Brandenburg Gate</i>        | 1.33                  | 1.33        | 1.34        | 1.32         | 1.33                        | 96.56         | 91.58         | 50.76        | 34.99        | 28.96                       |
| <i>Buckingham Palace</i>       | 1.44                  | 1.42        | 1.42        | 1.42         | 1.41                        | 113.20        | 106.07        | 61.56        | 42.09        | 34.99                       |
| <i>Colosseum Exterior</i>      | 1.11                  | 1.11        | 1.11        | 1.11         | 1.11                        | 131.04        | 118.17        | 69.50        | 50.29        | 40.73                       |
| <i>Grand-Place Brussels</i>    | 1.88                  | 1.87        | 1.88        | 1.87         | 1.90                        | 145.21        | 132.74        | 75.90        | 53.27        | 43.20                       |
| <i>Notre-Dame Front Facade</i> | 1.40                  | 1.42        | 1.42        | 1.41         | 1.41                        | 128.61        | 116.27        | 65.91        | 49.58        | 39.15                       |
| <i>Palace of Westminster</i>   | 1.12                  | 1.14        | 1.13        | 1.14         | 1.14                        | 85.18         | 78.80         | 47.27        | 31.86        | 26.94                       |
| <i>Pantheon Exterior</i>       | 1.43                  | 1.44        | 1.42        | 1.42         | 1.46                        | 94.91         | 89.97         | 53.23        | 35.68        | 30.14                       |
| <i>Reichstag</i>               | 1.31                  | 1.31        | 1.32        | 1.30         | 1.32                        | 172.78        | 164.01        | 85.98        | 66.29        | 54.45                       |
| <i>Sacré-Cœur</i>              | 0.52                  | 0.51        | 0.51        | 0.52         | 0.52                        | 87.81         | 77.42         | 46.96        | 33.18        | 27.55                       |
| <i>St. Peter's Square</i>      | 1.69                  | 1.71        | 1.70        | 1.70         | 1.72                        | 119.32        | 112.80        | 61.95        | 44.94        | 36.98                       |
| <i>Taj Mahal</i>               | 0.70                  | 0.70        | 0.69        | 0.70         | 0.71                        | 108.73        | 105.41        | 54.40        | 40.53        | 33.62                       |
| <i>Temple Nara Japan</i>       | 1.08                  | 1.08        | 1.07        | 1.07         | 1.07                        | 141.87        | 135.95        | 73.38        | 56.16        | 47.33                       |
| <i>Trevi Fountain</i>          | 1.58                  | 1.56        | 1.55        | 1.58         | 1.60                        | 85.05         | 76.31         | 51.93        | 34.75        | 28.80                       |
| <b>Overall</b>                 | <b>1.26</b>           | <b>1.26</b> | <b>1.26</b> | <b>1.25</b>  | <b>1.26</b>                 | <b>116.17</b> | <b>108.11</b> | <b>61.44</b> | <b>44.12</b> | <b>36.37</b>                |

Table 2. PhotoTourism [27] all 13 scenes from the training and validation sets. Per-scene results shown here are aggregated in Figure 5 and Table 1. Median combined pose error is computed as  $\max(\theta_R, \theta_t)$ , and runtime in ms is averaged over all pairs. RANSAC iteration count is fixed at 1000.

## References

- [1] Dhruv Agarwal, Taci Kucukpinar, Joshua Fraser, Jeffrey Kerley, Andrew R. Buck, Derek T. Anderson, and Kannappan Palaniappan. Simulating city-scale aerial data collection using Unreal Engine. In *IEEE Applied Imagery Pattern Recognition Workshop (AIPR)*, 2023. 6
- [2] Sameer Agarwal, Erin Connelly, Annalisa Crannell, Timothy Duff, and Rekha R Thomas. A computer vision problem in flatland. *SIAM Journal on Applied Algebra and Geometry*, 10(1):14–45, 2026. 2
- [3] Hadi Aliakbarpour, Kannappan Palaniappan, and Guna Seetharaman. Robust camera pose refinement and rapid SfM for multiview aerial imagery – Without RANSAC. *IEEE Geoscience and Remote Sensing Letters*, 12(11):2203–2207, 2015. 6
- [4] Hadi Aliakbarpour, Kannappan Palaniappan, and Guna Seetharaman. Fast structure from motion for sequential and wide area motion imagery. In *IEEE Int. Conf. on Computer Vision, Workshop on Video Summarization for Large-scale Analytics*, pages 1086–1093, 2015. 6
- [5] Daniel Barath. Five-point fundamental matrix estimation for uncalibrated cameras. In *2018 IEEE Conference on Computer Vision and Pattern Recognition, CVPR 2018, Salt Lake City, UT, USA, June 18-22, 2018*, pages 235–243. Computer Vision Foundation / IEEE Computer Society, 2018. 2
- [6] Robert C. Bolles and Martin A. Fischler. A RANSAC-based approach to model fitting and its application to finding cylinders in range data. In *Proceedings of the 7th International Joint Conference on Artificial Intelligence, IJCAI '81, Vancouver, BC, Canada, August 24-28, 1981*, pages 637–643. William Kaufmann, 1981. 2
- [7] Martin Bråtelund. A classification of critical configurations for any number of projective views. *arXiv preprint arXiv:2401.03450*, 2024. 2
- [8] Martin Bråtelund. Critical configurations for two projective views, a new approach. *Journal of Symbolic Computation*, 120:102226, 2024. 2
- [9] Jaired R. Collins, Taci Kucukpinar, Timothy Duff, Joshua Fraser, and Kannappan Palaniappan Guna Seetharaman. Fundamental constraints on camera centers arising from 3D-2D matches of points and lines. *Int. Journal of Computer Vision*, 134:94,19pp, 2026. 2
- [10] Erin Connelly, Sameer Agarwal, Alperen Ergur, and Rekha R. Thomas. The geometry of rank drop in a class of face-splitting matrix products: Part I. *Advances in Geometry*, 24(3):369–394, 2024. 2
- [11] David A. Cox, John Little, and Donal O’Shea. *Ideals, Varieties, and Algorithms: An Introduction to Computational Algebraic Geometry and Commutative Algebra*. Springer Nature Switzerland, fifth edition, 2025. 1
- [12] Daniel DeTone, Tomasz Malisiewicz, and Andrew Rabinovich. SuperPoint: self-supervised interest point detection and description. In *2018 IEEE/CVF Conference on Computer Vision and Pattern Recognition Workshops (CVPRW)*, pages 337–33712, 2018. 7
- [13] Timothy Duff, Kathlén Kohn, Anton Leykin, and Tomás Pajdla. PLMP–Point-Line Minimal Problems in Complete Multi-view Visibility. *IEEE Transactions on Pattern Analysis and Machine Intelligence*, 46(1):421–435, 2023. 2
- [14] Timothy Duff, Kathlén Kohn, Anton Leykin, and Tomás Pajdla. PL<sub>1</sub>p: Point-line minimal problems under partial visibility in three views. *Int. J. Comput. Vis.*, 132(8):3302–3323, 2024. 2
- [15] Ahmed Elliethy and Gaurav Sharma. Vehicle tracking in wide area motion imagery via stochastic progressive association across multiple frames. *IEEE Transactions on Image Processing*, 27(7):3644–3656, 2018. 6
- [16] Olivier D. Faugeras. What can be seen in three dimensions with an uncalibrated stereo rig. In *Computer Vision - ECCV’92, Second European Conference on Computer Vision, Santa Margherita Ligure, Italy, May 19-22, 1992, Proceedings*, pages 563–578. Springer, 1992. 2
- [17] Ke Gao, Hadi Aliakbarpour, Gunasekaran Seetharaman, and Kannappan Palaniappan. DCT-based local descriptor for robust matching and feature tracking in wide area motion imagery. *IEEE Geoscience and Remote Sensing Letters*, 18(8):1441–1445, 2021. 6
- [18] Daniel R. Grayson and Michael E. Stillman. Macaulay2, a software system for research in algebraic geometry. Available at <http://www2.macaulay2.com>. 1
- [19] Banglei Guan, Ji Zhao, Saibal Mitra, and Laurent Kneip. Six-point method for multi-camera systems with reduced solution space. *Int. J. Comput. Vis.*, 133(10):7270–7292, 2025. 2
- [20] Richard Hartley and Andrew Zisserman. *Multiple View Geometry in Computer Vision*. Cambridge University Press, 2004. 2, 3, 4, 5, 6
- [21] Richard I. Hartley and Fredrik Kahl. Critical configurations for projective reconstruction from multiple views. *Int. J. Comput. Vis.*, 71(1):5–47, 2007. 2
- [22] Richard I. Hartley, Rajiv Gupta, and Tom Chang. Stereo from uncalibrated cameras. In *IEEE Computer Society Conference on Computer Vision and Pattern Recognition, CVPR 1992, Proceedings, 15-18 June, 1992, Champaign, Illinois, USA*, pages 761–764. IEEE, 1992. 2
- [23] Robert J. Holt and Arun N. Netravali. Uniqueness of solutions to three perspective views of four points. *IEEE Trans. Pattern Anal. Mach. Intell.*, 17(3):303–307, 1995. 2
- [24] Petr Hruby, Viktor Korotynskiy, Timothy Duff, Luke Oeding, Marc Pollefeys, Tomas Pajdla, and Viktor Larsson. Four-view geometry with unknown radial distortion. In *Proceedings of the IEEE/CVF Conference on Computer Vision and Pattern Recognition*, pages 8990–9000, 2023. 2
- [25] Petr Hruby, Timothy Duff, and Marc Pollefeys. Efficient solution of point-line absolute pose. In *Proceedings of the IEEE/CVF Conference on Computer Vision and Pattern Recognition*, pages 21316–21325, 2024. 2
- [26] Petr Hruby, Timothy Duff, Anton Leykin, and Tomás Pajdla. Learning to solve hard minimal problems. *IEEE Trans. Pattern Anal. Mach. Intell.*, 47(11):9386–9401, 2025. 2

- [27] Yuhe Jin, Dmytro Mishkin, Anastasiia Mishchuk, Jiri Matas, Pascal Fua, Kwang Moo Yi, and Eduard Trulls. Image Matching across Wide Baselines: From Paper to Practice. *International Journal of Computer Vision*, 2020. 7, 8, 1, 2
- [28] Elham Soltani Kazemi, Imad Eddine Toubal, Gani Rahmon, Juan Mogollon, and Kannappan Palaniappan. Domain generalization for multiple video object segmentation and tracking using transformers and smart memory. *Int. Journal of Computer Vision*, 2026, Accepted. 7
- [29] Kim Kiehn, Albin Ahlbäck, and Kathlén Kohn. PLMP - point-line minimal problems for projective SfM. *CoRR*, abs/2503.04351, 2025. 1, 2
- [30] Viktor Larsson and contributors. PoseLib - Minimal Solvers for Camera Pose Estimation, 2020. 6, 8, 1
- [31] Viktor Larsson, Marc Pollefeys, and Magnus Oskarsson. Orthographic-perspective epipolar geometry. In *2021 IEEE/CVF International Conference on Computer Vision (ICCV)*, pages 5550–5558, 2021. 2
- [32] David Nistér. An efficient solution to the five-point relative pose problem. *IEEE transactions on pattern analysis and machine intelligence*, 26(6):756–770, 2004. 2, 6
- [33] David Nistér and Frederik Schaffalitzky. Four points in two or three calibrated views: Theory and practice. *Int. J. Comput. Vis.*, 67(2):211–231, 2006. 2
- [34] Magnus Oskarsson. Two-view orthographic epipolar geometry: Minimal and optimal solvers. *Journal of Mathematical Imaging and Vision*, 60(2):163–173, 2018. 2
- [35] Kannappan Palaniappan, Raghuv eer M Rao, and Guna Seetharaman. Wide-area persistent airborne video: Architecture and challenges. *Distributed Video Sensor Networks*, pages 349–371, 2011. 6
- [36] Linfei Pan, Dániel Baráth, Marc Pollefeys, and Johannes Lutz Schönberger. Global structure-from-motion revisited. In *European Conference on Computer Vision (ECCV)*, 2024. 1
- [37] Rengarajan Pelapur, Sema Candemir, Filiz Bunyak, Mahdiah Poostchi, Guna Seetharaman, and Kannappan Palaniappan. Persistent target tracking using likelihood fusion in wide-area and full motion video sequences. In *15th International Conference on Information Fusion*, pages 2420–2427, 2012. 6
- [38] Zhaoshuai Qi, Yifeng Hao, Rui Hu, Wenyong Chang, Jiaqi Yang, and Yanning Zhang. Indoor 3d reconstruction with an unknown camera-projector pair. *arXiv preprint arXiv:2407.01945*, 2024. 2
- [39] Long Quan, Bill Triggs, and Bernard Mourrain. Some results on minimal euclidean reconstruction from four points. *J. Math. Imaging Vis.*, 24(3):341–348, 2006. 2
- [40] Srikumar Ramalingam, Sofien Bouaziz, and Peter Sturm. Pose estimation using both points and lines for geolocalization. In *2011 IEEE International Conference on Robotics and Automation*, pages 4716–4723. IEEE, 2011. 2
- [41] René Ranftl and Vladlen Koltun. Deep fundamental matrix estimation. In *Computer Vision - ECCV 2018 - 15th European Conference, Munich, Germany, September 8-14, 2018, Proceedings, Part I*, pages 292–309. Springer, 2018. 1
- [42] Paul-Edouard Sarlin, Daniel DeTone, Tomasz Malisiewicz, and Andrew Rabinovich. Superglue: Learning feature matching with graph neural networks. In *Proceedings of the IEEE/CVF Conference on Computer Vision and Pattern Recognition (CVPR)*, 2020. 7
- [43] Johannes Lutz Schönberger and Jan-Michael Frahm. Structure-from-motion revisited. In *Conference on Computer Vision and Pattern Recognition (CVPR)*, 2016. 1
- [44] Lars Sommer, Wolfgang Krüger, and Michael Teutsch. Appearance and motion based persistent multiple object tracking in wide area motion imagery. In *IEEE Int. Conf. Computer Vision Workshops*, pages 3871–3881, 2021. 6
- [45] Henrik Stewénius. *Gröbner Basis Methods for Minimal Problems in Computer Vision*. PhD thesis, Lund University, Sweden, 2005. 2
- [46] Peter Sturm. A historical survey of geometric computer vision. In *14th Int. Conf. Computer Analysis of Images and Patterns (CAIP)*, pages 1–8. Springer Berlin Heidelberg, 2011. 2
- [47] Charalambos Tzamos, Viktor Kocur, Yaqing Ding, Daniel Barath, Zuzana Berger Haladová, Torsten Sattler, and Zuzana Kukelova. Practical solutions to the relative pose of three calibrated cameras. In *IEEE/CVF Conference on Computer Vision and Pattern Recognition, CVPR 2025, Nashville, TN, USA, June 11-15, 2025*, pages 21913–21923. Computer Vision Foundation / IEEE, 2025. 2, 7, 8
- [48] Tomás Werner. Constraint on five points in two images. In *IEEE Conference on Computer Vision and Pattern Recognition*, pages 203–208, 2003. 2
- [49] Zichao Zhang, Torsten Sattler, and Davide Scaramuzza. Reference pose generation for long-term visual localization via learned features and view synthesis. *International Journal of Computer Vision*, 129:821 – 844, 2020. 7, 8
